# Supplementary material for: Malnutrition drives infection susceptibility and dysregulated myelopoiesis that persists after refeeding intervention
Source: eLife. 2025 Jul 15;13:RP101670. doi: 10.7554/eLife.101670 (PMC12263150; doi:10.7554/eLife.101670)
Supplement: Figure 1—source data 1. [file elife-101670-fig1-data1.xlsx]

## Sheet: Fig 1b
Day	AL
0	100	100	100	100	100	100	100	100	100	100	100	100	100	100	100	100	100	100	100	100	100	100	100	100	100	100	100	100	100	100	100	100	100	100	100	100	100	100	100	100	100	100	100	100	100	100	100	100	100
7	100	101.176	105.525	104.118	99.5774	99.9066	101.564	102.216	102.567	111.111	108.235	98.3333	103.684	98.3333	100.568	95.8525	101.571	101.087	99.0196	95.0673	96.6184	104.444	98.1221	102.747	102.02	100	99.0244	103	101.571	99.5434	95.2381	100	104.639	102.727	104.145	103.825	104.211	101.456	100.478	103.067	101.744	102.151	102.312	104.712	107.018	103.665	100.498	101.042	99.4792
14	106.748	105.294	107.182	105.882	105.652	102.708	104.525	108.961	110.316	106.111	107.647	103.333	108.947	107.778	107.386	102.765	108.901	107.609	109.804	98.6547	100	112.222	100.469	112.088	106.061	104.717	104.39	108	106.283	113.242	99.0476	105	108.247	110.455	107.772	108.743	106.842	103.883	103.828	108.589	109.302	108.065	113.873	105.759	114.035	107.853	105.473	108.854	108.333
21	111.104	110	112.707	111.765	110.09	107.376	112.235	112.9	109.427	115.944	111.353	113.333	96.5263	113.5	114.205	109.217	111.518	114.13	117.157	106.278	102.899	116.667	112.207	110.44	104.04	112.264	104.878	110.5	102.618	105.479	100	110.5	114.948	118.636	122.28	114.754	113.684	118.447	110.526	121.472	116.86	110.215	121.387	109.424	116.959	115.183	129.353	123.958	122.917
28	113.926	117.647	120.442	115.882	115.267	107.983	112.793	113.245	112.685																107.071	113.208	108.293	110.5	103.665	117.808	104.762	129.5	115.464	117.273	123.316	115.847	115.263	118.932	110.048	122.699	122.093	111.828	127.168	113.613	122.807	118.848	123.383	126.562	129.167
35	122.699	123.529	127.072	123.529	116.059	109.197	112.235	111.669	113.87

## Sheet: Fig 1c
Day	40RD (% of AL body weight)
0	108.187	97.6608	107.602	116.959	106.433	97.2981	98.8666	96.7921	91.7324	106.76	100	94.4444	105.556	105.556	105.556	114.198	102.881	97.7366	98.7654	98.251	109.95	110.945	100.995	91.0448	93.5323	100.398	103.38	93.9364	102.386	98.4095	102.109	96.3567	100.671	92.5216	95.8773	92.397	97.6769	90.2851	101.373	100.845	99.435	106.78	105.65	108.475	94.9153	99.8981	100.408	105.505	93.2722
7	97.2973	90.4694	97.2973	101.849	99.0043	89.4768	85.4756	88.9267	87.1762	100.98	85.0267	80.2139	85.0267	85.0267	81.2834	108.583	99.2761	96.6908	95.1396	93.0714	95.8835	104.418	102.912	91.3655	85.3414	95.3786	93.9036	85.5457	93.9036	88.0039	95.511	91.6905	90.7354	85.4823	89.3028	88.3264	92.9752	87.8099	97.624	96.5909	93.956	99.4505	101.648	103.297	90.6593	94.246	94.246	96.7262	90.2778
14	92.4347	87.4828	92.9849	97.9367	96.8363	88.1738	81.5667	84.5613	83.2303	95.8741	77.0031	75.9625	79.6046	71.2799	74.4017	93.5701	83.9731	82.0537	81.5739	81.5739	84.5272	80.2292	82.1394	78.319	76.8863	85.9155	86.8545	84.507	87.7934	84.507	82.6631	77.3012	77.748	75.5139	76.4075	83.4951	86.8932	82.5243	88.835	89.8058	89.1192	93.2642	93.2642	95.8549	87.5648	90.2978	90.7781	93.6599	85.975
21	89.2271	85.0282	91.8515	96.0504	93.9509	85.5269	79.9321	80.941	82.5461	92.4516	77.6498	70.5264	79.3675	77.3467	77.0941	83.6364	78.6364	78.6364	75.9091	73.6364	78.6364	78.6364	83.6364	73.6364	75.9091	92.0074	95.2602	87.3606	92.4721	89.2193	86.3874	80.7155	79.8429	77.6614	78.9703	73.6568	74.9567	72.7903	79.7227	78.4229	83.089	85.5327	87.9765	87.9765	78.6901	76.9569	80.9147	84.8725	76.9569
28	81.9283	78.9309	86.9239	90.4209	89.9213	82.5448	79.3908	83.3559	81.103	93.719																89.204	91.4913	81.4273	90.5764	86.4593	80.8039	75.8819	70.5496	73.0107	70.9598	80.3571	79.932	74.4048	81.2075	82.9082	85.782	87.2038	90.5213	89.5735	82.4645	79.1084	82.6049	86.9755	79.5455
35	75.2941	70.5882	80	80	80	82.2392	77.8777	85.9263	82.2392	92.0863
[truncated: 1 more columns]

## Sheet: Fig 1d
Day	AL										40RD
0	3	3	3	3	3	3	3	3	3	3	3	3	3	3	3	3	3	3	3	3
7	3	3	3	3	3	3	3	3	3	3	3	3	3	3	3	3	3	3	3	3
14	3	3	3	3	3	3	3	3	3	3	3	2	3	3	3	3	3	3	3	3
21	3	3	3	3	3	3	3	3	3	3	3	2	3	3	3	3	3	3	3	2
28	3	3	3	3	3	3	3	3	3	3	3	2	3	2	3	3	3	2	3	2
35	3	3	3	3	3	3	3	3	3	3	3	2	3	2	3	3	3	2	2	3

## Sheet: Fig 1e
Day	AL										40RD
0	7.5	8	7.75	7.5	8	8.25	7.75	7.75	8	7.5	8.25	8	7	7.5	7.75	8.5	8	8	7.5	7.5
7	7.5	8.5	8.25	8.25	7.75	7.75	8.25	8	8.25	7.5	8.5	8	7.75	8	8	8.5	8.25	8	7.5	7.25
14	8	9	8.75	8.5	8.25	8.5	8	8.5	8.75	8.25	8.5	8	8.75	8.25	8	8.25	8.5	8	8	8
21	8.5	8.75	8.5	8	8.75	8.75	8.5	8	8.75	8.5	8.75	8	8.5	8	8	8	8.5	8.75	8	8
28	8.5	9	8.75	8.5	9.5	9.75	8.75	8.5	9.25	9	9	8	8.75	8.5	8.5	8.5	9	9	8.25	9
35	9	9.25	9	9	9.5	9	9	9.5	9.25	8.75	9	8.5	8.75	8.5	8.5	9.5	9.5	8.5	8.5	9

## Sheet: Fig 1f
Tissue	AL									40RD
Spleen	0.11	0.0888	0.0961	0.0877	0.0598	0.0875	0.0893	0.0999	0.0945	0.0563	0.0638	0.0678	0.0574	0.0741	0.0521	0.0449	0.0523	0.0413	0.0624
Thymus	0.0542	0.0806	0.0439	0.0772	0.0246	0.0511	0.0348	0.0505	0.033	0.0125	0.031	0.0304	0.0383	0.0197	0.0065	0.0051	0.0091	0.0076	0.0121
Lymph Node	0.0087	0.0053	0.0042	0.0085	0.0022	0.0023	0.0015	0.0018	0.0014	0.0017	0.0019	0.0021	0.0012	0.001	0.0004	0.0003	0.0003	0.0003	0.0002
Liver	1.2275	1.3468	1.2816	1.1091	1.0499	1.0369	1.1568	1.2468	1.2581	1.0845	1.22	1.1311	1.4087	1.2607	1.0983	1.0996	1.0963	1.1028	1.1819
Kidney	0.1785	0.1945	0.2058	0.1718	0.1247	0.1866	0.1737	0.1698	0.1719	0.1615	0.1755	0.1893	0.1895	0.1912	0.1429	0.1381	0.1461	0.1595	0.1749

## Sheet: Fig 1g
Tissue	AL																									40RD
spleen	12.6	10.51	9.54	10.34	3.48	12.09	6.79	9.6	12.04	13.21	12.67	7.32	11.03	14.09	8.63	6.97	8.2	5.74	17.22	15.58						5.86	4.9	5.6	8.72		2.24	3.15	3.26	2.48	2.28	1.33	1.31	1.7	1.92	1.75	4.92	5.33	5.33	10.25	5.74
thymus	7.63129	5.91356	10.061	5.34124	7.63128	5.91356	10.061	5.3412	4.32	6.71	9.3	10.2	11	5.2821												3.58904	6.64664	2.75624	5.45368	5.9312	1.79452	3.32332	1.37812	2.72684	2.9656	0.84	1.21	1.97	0.38	0.31
bone marrow	4.54	3.1	2.4	2.66	4.92	5.88	5.17	2.74	4.32	1.7	2	1.4	4.2	3.8	1.7	2	1.4	4.2	3.8	2.55	3	2.1	6.3	5.7		2.41	3.38	2.45	3.2	2.56	3.51	1.77	2.58	2.4	4.95	1.2	1.3	1.3	2.5	1.4	1.2	1.3	1.3	2.5	1.4	1.8	1.95	1.95	3.75
[truncated: 1 more columns]
