# Supplementary material for: Malnutrition drives infection susceptibility and dysregulated myelopoiesis that persists after refeeding intervention
Source: eLife. 2025 Jul 15;13:RP101670. doi: 10.7554/eLife.101670 (PMC12263150; doi:10.7554/eLife.101670)
Supplement: Figure 2—figure supplement 1—source data 1. [file elife-101670-fig2-figsupp1-data1.xlsx]

## Sheet: Fig 1-Fig supplement 1a
Day	AL																	40RD
0	4.57	2.74	3.97	6.46	3.85	2.85	4.05	2.95	3.21									0.53	0.64	0.8	0.99	0.72	2.38	2.62	2.59	4.49	3.15
5	3.47	3.61	4.45	2.05	5.2	4.79	2.13	3.22	4.94	6	5.38	6.07	5.3	3.58	4.05	3.64	4.46	3	1.77	0.75	0.75	3.48	3.91	5.96	3.75	5.45	2.53	5.09	2.46	3.08	2.65	3.03	2.78

## Sheet: Fig 1-Fig supplement 1b
Day	AL																			40RD
0	36	37.5	36.1	45.8	44.8	40.7	49.4	51.8	54.2	37.9	25.5	38.3	39.7	29.8	39.8	42.3	38.6	27.4	34.9	40.7	49.4	47.2	52.2	42.3	48.5	49.4	48.9	43.6	55.2	36.7	24.6	33.2	31.6	31.9	33.2	33.5	31.9	32
5	26.2	24.3	26.8	26.4	28.9	25.2	33	37.8	36.6	31.6	32.6	35.7	46.8	43.8	50.6	50.8	48.6			35.6	42.2	39.8	39.8	44.1	47.6	42.6	37.5	43.6	38.9	44.3	50.9	46.2	43	45.4	40.7

## Sheet: Fig 1-Fig supplement 1c
Day	AL																				40RD
0	2.39	2.06	2.18	1.93	0.79	2.41	1.28	1.67	2.3	1.94											1.26	1.21	1.28	2.28	0.62	0.84	0.9	0.65	0.63
5	4.09	3.15	2.4	2.45	1.51	2.36	1.61	2.12	1.81	1.8	2.17	1.87	1.6	1.71	1.74	5.64	4.51	3.38	2.86	4.35	1.23	1.45	1.16	2.09	0.55	1.5	0.21	1.88	2.95	0.89	0.86	0.45	1.02	0.2	0.15	2.67	3.9	3.81	4.54	3.08

## Sheet: Fig 1-Fig supplement 1d
Day	AL																				40RD
0	19	19.6	22.9	18.7	22.9	19.9	18.9	17.4	19.1	14.7											22.9	21.5	24.7	22.9	26.1	27.8	26.9	27.8	26.4	27.6
5	7.7	8.1	10	9.8	9.4	8.4	9.3	9.6	11.3	11.1	16.8	11.9	11	9.9	9.9	16.8	11.9	11	9.9	9.9	14.1	16.6	11.6	9.5	4.6	13.4	16.9	12.5	18.1	12.5	13.7	9.1	15	15.5	12.5	18.4	19.5	20.6	22.7	15

## Sheet: Fig 1-Fig supplement 1e
Day	AL																				40RD
0	1.67	1.39	1.45	1.34	0.66	1.41	0.69	1.29	1.64	1.4											0.89	0.91	0.92	1.41	0.48	0.55	0.73	0.5	0.57
5	3.34	2.15	2	2.39	0.99	2.2	1.13	1.4	1.48	1.47	1.59	1.63	1.51	2.13	2.09	5.3	3.85	3.02	2.86	4.07	1.1	1.14	0.99	1.93	0.6	2.04	0.19	2.13	1.97	0.77	0.89	0.64	1.02	0.18	0.13	2.57	3.28	3.81	3.7	4.1

## Sheet: Fig 1-Fig supplement 1f
Day	AL																				40RD
0	13.3	13.2	15.2	13	19	11.7	10.2	13.4	13.6	10.6											15.2	18.6	16.5	16.2	21.7	17.6	22.4	20.3	25
5	6.9	6.3	8.4	9.6	6.2	7.9	6.5	6.4	9.2	9.1	12.3	10.4	10.4	12.3	11.9	15.6	15.7	12.6	13.3	14.8	11.5	11.3	9.9	8.8	5	18.2	14.6	14.2	12.1	10.9	14.2	12.8	15	14	10.7	17.7	16.4	20.6	18.5	20
