# Supplementary material for: Malnutrition drives infection susceptibility and dysregulated myelopoiesis that persists after refeeding intervention
Source: eLife. 2025 Jul 15;13:RP101670. doi: 10.7554/eLife.101670 (PMC12263150; doi:10.7554/eLife.101670)
Supplement: Figure 2—source data 1. [file elife-101670-fig2-data1.xlsx]

## Sheet: Fig 2b
Days elapsed	AL	40RD
5	0
5	0
5	0
5	0
5	0
5		0
5		0
5		0
5		0
5		0
5	0
5	0
5	0
5	0
5	0
4		1
5		0
5		0
5		0
5		0
5	0
5	0
5	0
5	0
5	0
5		1
5		0
5		0
5		0
5		0
8	0
8	0
8	0
8	0
8	0
7		1
8		0
8		0
8		0
8		0
8	0
8	0
8	0
8	0
8	0
8		1
8		0
8		0
8		0
8		0
6	1
8	0
8	0
8	0
8	0
4		1
8		1
8		0
8		0
8		0
5	1
5	0
5	0
5	0
5	0
5		1
3		1
4		1
5		0
5		0
5	0
5	0
5	0
5	0
5	0
5		0
5		0
5		0
5		0
5		0
5	0
5	0
5	0
5	0
5	0
5		1
5		0
5		0
5		0
5		0
5	0
5	0
5	0
5	0
5	0
5		0
5		0
5		0
5		0
5		0
14	0
14	0
14	0
14	0
14	0
14	0
14	0
14	0
14	0
14	0
5		1
13		1
13		1
14		0
14		0
14		0
14		0
14		0
14		0
14		0

## Sheet: Fig 2c
Day	AL										40RD
0	0	0	0	0	0	0	0	0	0	0	0	0	0	1	0	0	1	0	0	1
1	0	0	0	0	0	0	0	0	0	0	0	0	0	1	0	0	1	0	0	1
2	0	0	0	0	1	0	0	0	0	1	1	0	0	3	1	0	2	0	0	2
3	1	0	1	0	3	0	1	0	1	2	2	0	1	6	1	2	3	2	2	4
4	2	0	1	0	4	0	2	0	3	4	3	2	2	8	3	2	4	2	2	5
5	2	0	1	0	5	0	1	0	5	4	4	2	3	12	6	4	4	3	2	6
6	0	1	1	0	5	0	1	0	6	5	5	4	3	24	8	5	4	3	2	9
7	0	0	1	0	6	0	0	0	5	5	7	5	3		9	4	5	3	1	10
8	0	0	0	0	6	0	0	0	4	5	7	5	3		9	3	4	3	1	10
9	0	0	0	0	8	0	0	0	5	4	6	3	2		9	4	5	1	1	10
10	0	0	0	0	9	0	0	0	5	3	6	2	2		10	4	4	2	1	12
11	0	0	0	0	7	0	0	0	4	3	6	2	2		11	5	4	2	1	10
12	0	0	0	0	6	0	0	0	4	3	5	3	2		12	4	5	1	1	13
13	0	0	0	0	5	0	0	0	3	3	4	2	1		15	4	4	0	0	16
14	0	0	0	0	4	0	0	0	3	3	4	2	1			3	3	0	0

## Sheet: Fig 2d
Day	AL																																		40RD
5	0	0	204545	126316	119643	0	0	0	358278	92075.9	0	0	633.333	1533.33	933333	5081.3	0	10093.7	673.684	38535.6	39292.7	0	0	0	52476.2	73336.8	4366.81	0	0	0	0	0	0	535.714	156757	2325.58	4358.97	9137.93	100	18568.2	1.32772e+06	32188.8	212922	1140.1	200	700000	14000	136667	1200000
8	231.839	0	0	0	0	0	0	0	0	0	0	0	0	0																					11387.2	0	44814.3	42124.5	0	0	402576	3.50649e+06	0	22231.5	1.0453e+07	0	12711.9	0
14	1	0	0	0	0	0	0	0	0	0																									0	300.802	0	277.687	705.053	2126.04	8149.96	76612.9	0
[truncated: 18 more columns]

## Sheet: Fig 2e
Day	AL																								40RD
0	1.26	1.05	0.95	1.03	0.35	1.21	0.68	0.96	1.2	1.32	1.27	0.73	1.1	1.41	0.86	0.7	0.82	0.57	1.72	1.56					0.59	0.49	0.56	0.87	0.22	0.31	0.33	0.25	0.23	0.13	0.13	0.17	0.19	0.17	0.49	0.53	0.53	1.03	0.57
5	1.6	1.8	2.4	2.5	1.6	2.8	1.74	2.2	1.6	1.62	1.29	1.57	1.45	1.73	1.76	3.4	2.45	2.4	2.15	2.75	1.35	1.9	1.65	1.7	2.9	1.9	1	2.2	1.2	1.12	0.13	1.5	1.63	0.71	0.63	0.5	0.68	0.13	0.12	1.45	2	1.85	2	2.05	1.4	1	1.25	0.65	1.15
8	2.29	1.88	2.86	2.16	2.61	1.38	2.52	2.54	2.36	1.65	0.65	0.83	0.78	0.78	0.66	0.74	0.83	0.39	0.9	0.95	0.32	0.43			0.15	0.2	0.22	0.18	0.31	0.23	0.29	0.41	0.39	0.8	0.21	0.25	0.21	0.84	0.42	0.19	0.19	0.79	0.82
14	1.85	1.24	0.93	1.54	2.16	0.62	0.31	2.16	0.31	1.24															0.21	0.54	0.28	0.12	0.08	0.38	0.38	0.62	0.1	1.24
