# Supplementary material for: Malnutrition drives infection susceptibility and dysregulated myelopoiesis that persists after refeeding intervention
Source: eLife. 2025 Jul 15;13:RP101670. doi: 10.7554/eLife.101670 (PMC12263150; doi:10.7554/eLife.101670)
Supplement: Figure 3—source data 1. [file elife-101670-fig3-data1.xlsx]

## Sheet: Fig 3a
Day	AL																				40RD
0	0.97	0.631	0.458	0.568	0.142	0.726	0.353	0.614	0.903	1.162											0.246	0.206	0.302	0.297	0.143	0.173	0.14	0.136	0.086
5	4.75	3.83	8.18	8.1	3.33	8.99	7.64	10.96	8.69	14.22	3.19	3.52	5.44	5.99	3.15	10.91	9.7	8.64	6.6	8.36	5.28	2.79	2.59	4.14	3	7.37	0.04	7.83	3	1.78	1.12	1.27	0.22	0.26	4.1	3.52	4.81	3.78	6.79
8	15.43	5.67	14.45	7.08	6.84	4.15	19.91	7.99	7.07	5.02											0.45	0.76	0.43	0.41	1.07	0.5	0.43	1.76	0.6
14	5.82	4.11	2.9	4.08	8.24	0.26	0.39	3.65	1.72	2.66											0.98	0.75	0.02	0	1.18	1.6	1.49	0.04	0.74

## Sheet: Fig 3b
Day	AL															40RD
0	0.145	0.095	0.069	0.085	0.021	0.109	0.053	0.092	0.135	0.174						0.037	0.031	0.045	0.044	0.021	0.026	0.021	0.02	0.013
5	1.02	0.86	1.27	1.38	0.43	3.47	0.9	1.32	1.89	1.7	5.2	4.73	3.34	2.77	4.13	1.39	0.68	0.39	0.88	0.47	1.06	0.04	2.31	0.52	1.64	1.5	2.28	1.74
8	1.93103	0.743078	3.09414	1.94582	1.73081	0.710467	4.0061	1.65442	1.56973	1.20419						0.0450975	0.300345	0.175559	0.13898	0.511098	0	0.030325	0.0655013	0.754937	0.167565
14	0.63	0.45	0.33	0.42	1.26	0.03	0.04	0.32	0.25	0.5						0.2	0.2	0	0	0.33	0.44	0.33	0	0.09

## Sheet: Fig 3c
	AL										40RD
IFNγ	2.08	3.46	9.33	5.05	2.32	2.35	6.63	2.06	4	2.81	0.3225	0.61974	0.28296	0.2394	0.99144	0.00693	0.00291	0.72036	0.1161
TNFα	1.67	2.84	5.27	2.1	4.96	0.83	4.56	1.5	1.99	1.39	0.07	0.19	0.12	0.12	0.28	0.02	0.01	0.22	0.08

## Sheet: Fig 3d
	AL										40RD
IFNγ	7.4675	13.1298	8.1345	7.8815	7.9034	7.6245	7.1608	13.4348	10.1364	7.5284	3.8114	4.9295	7.4975	7.0339	4.7599	7.8774	0.8611	5.2509	8.7353
TNFα	1.7861	1.8988	2.9104	2.4706	1.9906	2.2708	2.7737	2.5846	3.9013	2.5269	1.577	1.6665	1.6665	2.0359	0.8558	0.4695	0.413	0.8976	1.7181
