# Supplementary material for: Malnutrition drives infection susceptibility and dysregulated myelopoiesis that persists after refeeding intervention
Source: eLife. 2025 Jul 15;13:RP101670. doi: 10.7554/eLife.101670 (PMC12263150; doi:10.7554/eLife.101670)
Supplement: Figure 4—figure supplement 1—source data 1. [file elife-101670-fig4-figsupp1-data1.xlsx]

## Sheet: Fig 4-Fig supplement 1a
Day	AL																	40RD
0	1.43	0.92	1.41	4.41	3.46	0.72	0.76	1.58	1.87									0.59	1.09	1.2	1.62	0.96	0.75	0.71	0.78	1.5	0.45
5	1.14	1.37	1.64	1.51	1.09	1.15	0.67	0.85	1.11	1.55	1.34	1.56	1.98	0.73	4.86	5.15	3.03	1.73	1.03	1	1.26	0.81	1.77	0.53	0.55	0.64	1.63	0.87	0.92	2.99	0.56	1.11	0.5

## Sheet: Fig 4-Fig supplement 1b
Day	AL																	40RD
0	8.42	4.58	10.1	10.5	9.11	6.22	5.48	6.02	5.98	9.2								4.91	8.38		6.49	6.87	3.27	3.58	5.41	3.75	4.91	3.23
5	4.57	4.88	4.2	5.19	4.76	4.8	5.17	5.83	5.04	6.88	8.39	5.69	11	5.4	8.17	7.92	6.67	5.66	5.03	6.07	5.26	5.04	4.84	4.75	5.09	4.54	4.45	6.57	6.44	4.27	4.04	3.72

## Sheet: Fig 4-Fig supplement 1c
Day	AL																		40RD
0	0.403	0.704	0.748	0.581	0.294	0.319	0.3216	0.2727	0.43215	0.1975									0.188	0.248	0.22	0.222	0.242	0.15555	0.084	0.2223	0.1584	0.228
5	1.99	2.6	2.66	1.91		1.53	1.9	1.03	0.808	5.1	5.64	7.44	4.73	6.05	4.05	4.18	4.29	4.08	1.43	0.629	0.719	0.567	1.65	1.72	2.03	3	2.59	2.8	3.4	1.33	1.3	1.19	0.715	1.09

## Sheet: Fig 4-Fig supplement 1d
Day	AL																		40RD
0	0.6	0.39	0.46	0.44	0.51	0.72	0.44	0.5	0.38	0.58									0.45	0.6	0.67	0.9	0.79	0.73	1.14	1.24	1.1	0.5
5	0.55	0.61	0.59	0.82	0.46	0.5	0.92	0.56	0.29	0.29	0.39	0.44	0.32	0.31	0.37	0.54	0.44	0.47	0.61	0.64	0.88	0.62	0.77	0.92	0.32	0.34	0.32	0.28	0.15	0.34	0.18	0.27	0.09

## Sheet: Fig 4-Fig supplement 1e
AL	40RD (1week)	40RD (2week)
3.96	4.92	2.04
4.48	3.16	2.21
6.5	2.63	2.64
2.86	1.94	2.76
4.54	4.13	1.94
3.3	3.75	2.08
4.59	2.84	2.54
5.57	1.87	3.05

## Sheet: Fig 4-Fig supplement 1f
AL	40RD (1week)	40RD (2week)
2.04	0.73	0.1
3.12	0.53	0.34
4.63	3.12	1.02
1.66	0.6	1.14
2.37	0.59	0.41
3.23	1.41	0.77
2.8	1.13	0.63
3.21	1.87	0.79
