# Supplementary material for: Malnutrition drives infection susceptibility and dysregulated myelopoiesis that persists after refeeding intervention
Source: eLife. 2025 Jul 15;13:RP101670. doi: 10.7554/eLife.101670 (PMC12263150; doi:10.7554/eLife.101670)
Supplement: Figure 4—source data 1. [file elife-101670-fig4-data1.xlsx]

## Sheet: Fig 4a
AL																		40RD
2.5	2.8	3.9	2.9	2.3	2.4	1.3	1.45	2.2	2.25	1.6	1.4	2.75	1.4	4.65	1.3	2.75	1.35	3.05	2.05	1.65	2.4	1.6	2.5	1.1	1.15	1.25	3.6	1.95	1.8	1.35	5.95	6.5	4.55

## Sheet: Fig 4b
Bone marrow
Day	AL																			40RD
0	5.29	6.44	4.83	15.1	10.1	4.48	6.37	6.8	5.34	7.37										1.8	2.94	3.12	5.2	3	5.15	4.59	4.64	6.35	7.4
5	8.675	10.276	14.781	10.266	6.969	7.272	6.981	5.1185	5.544	4.5225	3.904	4.214	7.095	6.7425	4.94	1.352	3.1075	2.214	2.46	7.93	5.781	4.9995	7.704	5.36	7.55	3.938	3.1165	4.4125	8.964	6.4545	2.178	1.593	9.163	1.8265	7.1435
Spleen
Day	AL																			40RD
0	0.81	0.29	0.67	0.99	0.49	0.79	1.29	0.98	2.91	2.26										0.09	0.07	0.1	0.1	0.1	0.21	0.4	0.39	0.55
5	1.96	2.22	1.5	0.89	1.14	1.31	0.53	0.15	1.63	2.55	2.4	2.06	1.73	2.01	2.28	1.02	0.63			0.44	0.22	0.34	0.1	0.32	0.43	1	1.3	0.94	0.72	1.07	1.06	0.8	0.94	0.55	1.17

## Sheet: Fig 4c
Bone marrow
Day	AL													40RD
0	41.6	36.1	34.8	34.1	32.8	37.4	38	40.7	38.7	31.1				31.1	33.3	33	26.1	35.4	16.6	23.3	32.6	21.3	24.3
5	34.7	36.7	37.9	35.4	30.3	30.3	53.7	35.3	35.8	27.1	35.3	24.9	33.1	26	28.2	30.3	32.1	33.5	30.2	35.8	27.1	35.3	24.9	33.1
Spleen
Day	AL														40RD
0	1.28	0.8	1.22	1.4	1.14	1.13	1.57	1.71	1.69	1.45				0.67	0.57	0.57	0.52	0.6	0.42	0.75	0.73	1.16	0.96
5	2.95	3.05	1.81	2.3	1.27	1.38	1.65	2.35	1.22	2.24	1.98	2.04	1.22	0.52	0.52	0.81	0.55	0.4	0.52	0.67	0.67	0.52	0.36	0.5

## Sheet: Fig 4f
Bone marrow
Day	AL										40RD
0	1.139	2.16	1.33	3.108	2.736	1.581	2.38	1.988	5.334	2.926	1.164	1.183	1.196	2	1.876	1.224	1.144	0.845	1.65	1.022
5	4.27	5.58	3.61	8.9	7.37	6.5565	1.911	2.42	1.3635		2.112	1.586	1.365	3.325	2.156	1.314	0.9585	4.641	4.355	2.821
Spleen
Day	AL										40RD
0	1.09	0.43	1.32	1.11	0.6	4.6	3.03	1.09	5.51	2.18	0.07	0.09	0.12	0.19	0.1	0.44	0.34	0.23	0.57	0.42
5	4.08	2.45	2.88	3.23	3.58	7.97	5.89	7.43	6.97		1	1.6	1.28	1.58	1.21	3.5	2.3	2.63	1.5	3.11

## Sheet: Fig 4g
Bone marrow
Day	AL										40RD
0	2.057	2.68	2.1	5.67	4.066	0.833	1.24	0.98	2.772	1.786	1.224	1.17	0.949	2.375	1.12	0.804	0.78	0.507	1.1	0.518
5	3.5	5.32	4.38	9.45	8.44	5.0685	1.248	2.1175	0.6615		2.364	2.782	2.691	5.275	2.106	1.3905	9.282	9.035	7.462	3.44
Spleen
Day	AL										40RD
0	0.58	0.15	0.56	0.65	0.34	2.09	1.48	0.54	1.07	0.45	0.05	0.05	0.07	0.11	0.05	0.09	0.08	0.11	0.22	0.52
5	4.76	3.19	3.36	2.37	3.3	1.49	1.06	1.11	2.38	2.24	0.88	2.8	2.22	1.46	2.46	0.63	0.59	0.42	0.71
