# Supplementary material for: Malnutrition drives infection susceptibility and dysregulated myelopoiesis that persists after refeeding intervention
Source: eLife. 2025 Jul 15;13:RP101670. doi: 10.7554/eLife.101670 (PMC12263150; doi:10.7554/eLife.101670)
Supplement: Figure 5—source data 1. [file elife-101670-fig5-data1.xlsx]

## Sheet: Fig 5b
Day	AL																									40RD
0	100	100	100	100	100	100	100	100	100	100	100	100	100	100	100	100	100	100	100	100	100	100	100	100	100
7	107.018	103.665	100.498	101.042	99.4792	103.067	101.744	102.151	102.312	104.712	104.145	103.825	104.211	101.456	100.478	100.568	95.8525	101.571	101.087	99.0196	95.0673	96.6184	104.444	98.1221	102.747
14	114.035	107.853	105.473	108.854	108.333	108.589	109.302	108.065	113.873	105.759	107.772	108.743	106.842	103.883	103.828	107.386	102.765	108.901	107.609	109.804	98.6547	100	112.222	100.469	112.088
21	116.959	115.183	129.353	123.958	122.917	121.472	116.86	110.215	121.387	109.424	122.28	114.754	113.684	118.447	110.526	114.205	109.217	111.518	114.13	117.157	106.278	102.899	116.667	112.207	110.44
28	122.807	118.848	123.383	126.562	129.167	122.699	122.093	111.828	127.168	113.613	123.316	115.847	115.263	118.932	110.048	117.614	107.373	114.136	115.217	128.922	111.659	104.831	126.667	112.676	116.484
35	124.561	122.513	126.368	127.604	129.688	128.221	126.163	113.441	130.636	116.754	124.352	120.219	116.316	120.388	112.44	118.75	110.138	109.948	114.13	117.157	112.108	110.145	127.778	115.023	117.582
42	128.07	124.607	128.856	129.688	130.729	128.834	126.744	115.054	131.792	117.801	127.979	125.137	123.684	123.786	116.746	121.591	119.355	109.948	111.413	124.02	116.143	106.28	136.111	112.207	119.78	128.07	124.607	128.856	129.688	130.729	128.834	126.744	115.054	131.792	117.801	127.979	125.137	123.684	123.786	116.746	121.591	119.355	109.948	111.413	124.02	116.143	106.28	136.111	112.207
49	133.333	126.178	130.846	130.729	134.896	132.515	130.233	118.28	134.104	119.895	130.57	124.59	125.263	125.728	118.182	123.864	129.032	117.277	117.391	129.412	118.834	109.662	137.778	113.615	134.615	140.594	132.353	127.528	136.364	134.066	134.078	123.75	140.588	123.757	135.393
56	133.918	126.178	131.343	132.812	135.417	134.969	136.047	120.968	138.15	120.419	136.269	126.23	126.842	130.097	120.574	132.386	134.562	123.037	120.652	136.275						117.327	124.706	117.978	123.864	116.484	127.374	130.625	125.882	121.547	125.281
63	134.503	126.178	132.338	135.417	134.896	136.196	140.116	128.495	149.133	125.131	144.041	125.683	127.895	133.981	123.923											115.347	116.471	121.348	120.455	114.835	124.022	125.625	128.235	126.519	116.854
70	134.503	136.649	143.284	141.667	146.354	138.65	143.023	132.796	157.803	126.702	141.969	126.776	130.526	137.864	125.837											109.406	105.294	109.551	115.909	114.286	112.849	110.625	117.059	111.602	114.607
77	133.918	142.932	149.254	149.479	151.042	140.491	145.349	140.323	164.74	135.602	145.078	126.23	132.105	145.146	131.579											107.921	99.4118	101.124	111.364	109.89	105.587	108.75	111.765	101.105	112.36
[truncated: 26 more columns]

## Sheet: Fig 5c
Day	40RD										RF
0											92.397	97.6769	90.2851	101.373	100.845	99.435	106.78	105.65	108.475	94.9153	99.8981	100.408	105.505	93.2722	102.446	114.198	102.881	97.7366	98.7654	98.251	109.95	110.945	100.995	91.0448	93.5323
7											88.3264	92.9752	87.8099	97.624	96.5909	93.956	99.4505	101.648	103.297	90.6593	94.246	94.246	96.7262	90.2778	95.7341	108.583	99.2761	96.6908	95.1396	93.0714	95.8835	104.418	102.912	91.3655	85.3414
14											83.4951	86.8932	82.5243	88.835	89.8058	89.1192	93.2642	93.2642	95.8549	87.5648	90.2978	90.7781	93.6599	85.975	90.7781	93.5701	83.9731	82.0537	81.5739	81.5739	84.5272	80.2292	82.1394	78.319	76.8863
21											73.6568	74.9567	72.7903	79.7227	78.4229	83.089	85.5327	87.9765	87.9765	78.6901	76.9569	80.9147	84.8725	76.9569	80.4749	83.6364	78.6364	78.6364	75.9091	73.6364	78.6364	78.6364	83.6364	73.6364	75.9091
28											80.3571	79.932	74.4048	81.2075	82.9082	85.782	87.2038	90.5213	89.5735	82.4645	79.1084	82.6049	86.9755	79.5455	83.9161	97.97	97.5287	94.8808	95.7635	90.4678	94.6771	92.4956	95.986	85.5148	89.4415
35											85.7741	84.5188	81.1715	89.5397	89.1213	88.8582	92.081	95.3039	93.4622	87.9374	83.3333	89.7766	89.7766	85.9107	90.6357	108.853	103.433	96.206	93.4959	93.0443	107.541	109.254	98.1148	92.9734	92.9734
42											86.7599	92.1053	85.5263	94.9836	94.5724	92.2374	98.6301	99.5434	101.37	90.411	84.7107	87.1901	90.0826	86.3636	92.9752	100.789	96.4067	98.1595	103.856	95.5302	110.5	107.113	91.8713	85.9441	96.9517
49	118.762	94.0898	94.9261	100.362	102.035	100.362	82.799	99.9442	93.6716	100.781	106.28	92.5926	110.306	92.5926	88.9694	92.3283	99.0187	100.803	101.695	89.6521	84.1503	93.5458	91.9118	85.7843	98.4477	113.561	95.6739	113.977	95.6739	91.9301	109.617	115.729	99.022	93.317	97.7995
56	97.3439	87.0756	86.2541	89.54	87.0756	93.6473	85.8434	87.897	90.3614	91.5936	87.6701	92.8743	86.0689	94.8759	94.8759	91.899	99.3031	102.352	100.174	89.2857	81.2749	96.0159	95.2191	84.8606	101.195	112.698	95.2381	111.905	95.6349	92.0635
63	93.4242	79.3905	86.6079	85.004	83.8011	89.0136	80.5934	87.4098	91.8204	83.4002	87.5796	95.5414	91.9586	96.3376	97.1338	90.0751	95.9133	100.5	99.2494	87.156	79.7045	97.5894	97.2006	85.1477	103.81
70	85.7254	69.4337	75.64	79.1311	80.6827	78.3553	68.6579	77.1916	78.3553	79.1311	84.8348	94.5946	89.7147	92.3423	95.3453	88.3306	96.0292	102.512	98.4603	85.0891	79.9385	97.6172	98.3859	83.7817	103.766
77	81.7704	63.3908	67.5169	73.5184	75.0188	70.8927	65.2663	71.2678	68.6422	75.0188	82.6686	95.7215	88.8325	91.008	97.5344	86.838	93.8474	103.583	96.9626	81.7757	77.0958	97.3054	97.3054	80.8383	103.668

## Sheet: Fig 5d
Day	AL										40RD										RF
0	7.5	8	7.75	7.5	8	8.25	7.75	7.75	8	7.5											8.25	8	7	7.5	7.75	8.5	8	8	7.5	7.5
7	7.5	8.5	8.25	8.25	7.75	7.75	8.25	8	8.25	7.5											8.5	8	7.75	8	8	8.5	8.25	8	7.5	7.25
14	8	9	8.75	8.5	8.25	8.5	8	8.5	8.75	8.25											8.5	8	8.75	8.25	8	8.25	8.5	8	8	8
21	8.5	8.75	8.5	8	8.75	8.75	8.5	8	8.75	8.5											8.75	8	8.5	8	8	8	8.5	8.75	8	8
28	8.5	9	8.75	8.5	9.5	9.75	8.75	8.5	9.25	9											9	8	8.75	8.5	8.5	8.5	9	9	8.25	9
35	9	9.25	9	9	9.5	9	9	9.5	9.25	8.75	9.25	9	8.75	8.75	9.75	8.75	9	9.25	9.5	9.5	9	8.5	8.75	8.5	8.5	9.5	9.5	8.5	8.5	9
42	10	9	9.25	9.75	9.25	9.5	9.75	9.75	9.5	10	9.25	9	8.75	9	9.5	8.75	8.75	9	9.75	9.25	9	9.25	9	9.5	8.75	9	8.75	9.25	8.75	8.75
49	10	10.25	9.5	10	9.75	9.5	9.75	9.75	9.75	10	9	9	9	9.25	9.25	9.25	9	8.75	9.75	9.5	9.5	9.5	9.25	9.5	8.75	10	10.25	9.25	9.5	9.25
56	10.25	10.25	9.5	10.25	10	10	10	10.25	10	10.5	9	8.75	9.25	9	9.5	9	8.75	9.5	9.5	9.75	9.5	9.75	9.75	9.75	8.75	10	10.25	9.5	9.75	9.25

## Sheet: Fig 5e
Tissue	AL										RF
spleen	5	10	16.25	21.75	10.5	14.25	7.15	17.5	9.1	8.5	12	6.25	17.5	8.25	20	12	9	5.75	17.25	8
thymus	7	5.25	4	3.75	4.25	0.48	2.2	2.3	1.6	0.79	5	4	5.25	7.5	5.75	0.94	1.4	0.44	1.2	0.65
bone marrow	3.75	4.8	5.7	6.3	7.8	2.5	3	3.5	12.5	7	8	2	3.5	7.75	4	5.4	2.5	3.5	6.9	5.85

## Sheet: Fig 5f
	AL										RF
Spleen	0.0774	0.0819	0.0848	0.0817	0.0797	0.11	0.0951	0.1402	0.1059	0.0815	0.0945	0.08	0.0779	0.0926	0.1055	0.117	0.0849	0.057	0.0812	0.1009
Thymus	0.0739	0.0849	0.0409	0.0675	0.0621	0.0387	0.068	0.0621	0.0922	0.0843	0.081	0.0716	0.0867	0.0764	0.073	0.0525	0.0981	0.0329	0.0658	0.0858
Lymph Node	0.0121	0.0123	0.006	0.0137	0.0124	0.007	0.006	0.0075	0.0058	0.0069	0.0073	0.0121	0.0123	0.017	0.0174	0.0066	0.0016	0.0041	0.0021	0.0022
Liver	1.3204	1.3432	1.2128	1.0328	1.069	1.3117	1.1912	1.1003	1.4127	1.4267	1.1532	1.327	1.2009	1.1474	1.4603	1.2958	1.1269	1.2406	1.1365	1.0067
Kidney	0.1727	0.1632	0.1625	0.1371	0.1415	0.1704	0.1428	0.2181	0.1798	0.148	0.1415	0.1546	0.1428	0.1461	0.1648	0.2124	0.1523	0.164	0.1372	0.1789
