# Supplementary material for: Malnutrition drives infection susceptibility and dysregulated myelopoiesis that persists after refeeding intervention
Source: eLife. 2025 Jul 15;13:RP101670. doi: 10.7554/eLife.101670 (PMC12263150; doi:10.7554/eLife.101670)
Supplement: Figure 6—figure supplement 1—source data 1. [file elife-101670-fig6-figsupp1-data1.xlsx]

## Sheet: Fig 6-Fig supplement 1a
Day	AL										40RD
0	37.2	43.9	43.6	46.4	40.8	39.6	43.3	42.5	47.8	46	40.6	41.4	38.4	29.6	25.3	49.2	33.5	37.8	29.5
5	56.5	61.4	61.9	57.8	53.9	56.2	46.2	56.3	53.3	52.5	57.6	68	58.9	61.8	59	57.5	57.5	54.6	61.6

## Sheet: Fig 6-Fig supplement 1b
Day	AL										40RD
0	1.86	4.39	7.09	10.09	4.28	5.64	3.1	7.44	4.35	3.91	4.87	2.59	6.72	2.44	5.06	5.9	1.93	6.52	2.36
5	10.17	9.82	8.36	8.67	7.55	7.87	7.39	7.6	6.66	5.51	8.93	7.48	10.9	10.2	11.51	7.87	7.39	7.6	6.66	5.51

## Sheet: Fig 6-Fig supplement 1c
Day	AL															40RD
0	13	16.4	12.8	16.2	15.1	13.6	16.1	14.3								19.4	7.3	13.8	16	15	15.3	12.4	13.3	13.6
5	14.2	22.5	18.2	12.1	18.5	13.3	9.3	10.6	10	9.2	11.4	12.9	12.7	10.7	11.7	18.1	14.9	13.6	15.5	13.4	11.3	12.1	12.9	12.6	12.3	10.4	10.7	10.3	12.6

## Sheet: Fig 6-Fig supplement 1d
Day	AL															40RD
0	0.65	1.64	1.29	1.23	1.59	2.37	1.47	1.22								1.46	0.45	1.46	1.32	1.84	0.71	1.2	1.08
5	2.66	3.66	4.78	2.12	5.55	2.39	1.49	1.43	1.5	3.52	1.6	2.06	1.71	1.34	2.08	2.72	3.17	2.38	2.33	2.35	1.75	3	2.24	2.13	2.46	1.91	2.33	2.42	1.6	2.29

## Sheet: Fig 6-Fig supplement 1e
Day	AL															40RD
0	14.2	14.6	10.7	14	14.2	11.4	12.7	14.3								14.2	14.6	10.7	14	14.2	11.2	9.9	10.3	10	11.4
5	15.9	15.8	12.8	9.6	14.7	10.2	8.7	8.4	8.2	7.7	10.9	12.3	10.5	10.2	10.2	10	10.5	14.3	11.4	11.2	9.3	9.4	8.8	9.5	10	9.4	8.2	8.1	10.5

## Sheet: Fig 6-Fig supplement 1f
Day	AL															40RD
0	0.71	1.46	1.74	1.07	1.49	1.13	1.16	1.22								1	0.51	2	1.21	1.26	1.34	0.59	1.11	0.91
5	3.36	3.06	3.36	1.69	4.41	1.84	1.39	3.05	1.23	1.08	1.53	1.97	1.42	1.28	2	1.5	2.23	2.5	1.71	1.96	1.44	1.74	1.45	1.85	1.55	1.32	1.73	3.04	2
