# Supplementary material for: Malnutrition drives infection susceptibility and dysregulated myelopoiesis that persists after refeeding intervention
Source: eLife. 2025 Jul 15;13:RP101670. doi: 10.7554/eLife.101670 (PMC12263150; doi:10.7554/eLife.101670)
Supplement: Figure 6—figure supplement 2—source data 1. [file elife-101670-fig6-figsupp2-data1.xlsx]

## Sheet: Fig 6-Fig supplement 2a
Day	AL														40RD
0	0.46	0.38	0.34	0.23	0.46	0.21	0.43	0.46	0.26	0.38					0.24	0.91	0.33	0.38	0.44	0.5	0.2	0.11	0.34
5	0.93	0.34	0.17	0.64	0.14	0.79	0.55	0.41	0.64	0.44	0.87	0.5	0.7	0.87	0.28	0.15	0.37	0.27	0.38	0.38	0.11	0.52	0.54	0.33	0.44	0.29	0.14	0.58	0.15

## Sheet: Fig 6-Fig supplement 2b
Day	AL														40RD
0	0.23	0.38	0.55	0.5	0.48	0.3	0.31	0.81	0.24	0.32					0.29	0.57	0.58	0.31	0.88	0.6	0.12	0.19	0.27
5	1.74	0.55	0.45	1.12	0.42	1.42	0.88	0.62	0.9	0.62	1.39	0.68	0.88	0.91	0.42	0.32	0.65	0.41	0.67	0.59	0.96	0.89	0.64	0.68	0.41	0.9

## Sheet: Fig 6-Fig supplement 2c
Day	AL														40RD
0	20.8	14.8	16.68	18.3	18	14.9	17.2	19.9	14.8	17.8					14.6	14.8	13.2	9.84	14.2	15.4	11.6	9.6	12.7	13.4
5	24.9	15	25.5	22	21	28.8	37.9	18.7	33.1	34.9	33	38.9	30.4	28	24.5	13.4	29.8	24.8	15.3	35.5	8.87	32.3	40.7	34.9	38.5	33.8	36.1

## Sheet: Fig 6-Fig supplement 2d
Day	AL														40RD
0	5.59	8.26	11.34	9.32	13.88	5.59	8.26	11.34	9.32	13.88					11.68	2.96	2.31	7.63	5.68	5.68	9.28	7.78	5.98	5.36
5	13.2	12	9.69	10.56	8.61	18.58	16.11	6.83	8.77	10.64	26.4	17.12	15.5	8.4	14.7	6.3	22.95	8.68	4.74	9.05	7.32	20.69	15.26	19.54	26.18	20.08	19.13

## Sheet: Fig 6-Fig supplement 2e
Day	AL														40RD
0	5.13	3.99	4	4.93	2.95	7.87	7.24	5.88	3.4	5.08					3.79	3.09	2.71	2.67	2.14	2.51	5.51	4.94	2.77	4.89
5	18.6	14.6	15.9	10.6	11.8	12.6	7.73	10.2	13.5	9.89	2.7	15.9	15.9	8.75	6.93	11.7	10.1	10.6	10.5	8.84	7.84	2.28	10.8	5.61	1.52	10.7	12.6

## Sheet: Fig 6-Fig supplement 2f
Day	AL														40RD
0	1.28	1.2	1.4	6.16	2.07	2.95	3.48	3.35	2.14	3.96					3.03	0.62	0.47	2.07	0.86	0.93	4.41	4	1.3	1.96
5	9.86	11.68	6.04	5.09	4.84	8.13	3.29	2.7	4.12	7.91	1.19	8.11	4.77	1.93	4.16	5.5	7.78	3.71	3.26	2.25	7.45	0.86	6.05	9.52	6.68
