# Supplementary material for: Malnutrition drives infection susceptibility and dysregulated myelopoiesis that persists after refeeding intervention
Source: eLife. 2025 Jul 15;13:RP101670. doi: 10.7554/eLife.101670 (PMC12263150; doi:10.7554/eLife.101670)
Supplement: Figure 6—figure supplement 3—source data 1. [file elife-101670-fig6-figsupp3-data1.xlsx]

## Sheet: Fig 6-Fig supplement 3a
Day	AL											40RD
0	0.63	1.06	0.45	0.28	0.53	0.83	0.68	0.62	0.68	0.71	0.65	0.31	0.66	0.79	0.65	0.64	0.51	0.68	0.89	0.88	0.9	0.69
5	0.81	0.88	0.72	0.58	0.63	0.65	0.44	0.88	0.64	0.94		0.49	0.88	0.48	0.1	0.59	0.71	0.61	0.67	0.69	0.74

## Sheet: Fig 6-Fig supplement 3b
Day	AL										40RD
0	0.57	1.34	0.5	2.03	1.44	0.94	1.06	1.22	1.42	1.95	1.04	0.72	0.37	1.59	0.89	0.66	1.82	1.86	1.05	1.16
5	1.86	1.51	2.24	1.61	1.18	0.6	2.46	1.33	1.32		1.81	1.32	3.37	0.86	1.21	1.99	1.23	1.02	1.93

## Sheet: Fig 6-Fig supplement 3c
Day	AL										40RD
0	2.28	4.45	1.44	1.62	2.05	2.51	2.2	2.14	2.26	2.5	1.3	3.61	2.11	2.05	2.23	1.8	2.27	2.3	2.23	2.9
5	2.33	1.33	3.48	4.42	4.44	1.96	3.07	2.75	2.58		2.35	5.16	4.09	0.9	4.1	5.3	2.19	1.5	2.17

## Sheet: Fig 6-Fig supplement 3d
Day	AL										40RD
0	0.57	1.34	0.5	2.03	1.44	0.94	1.06	1.22	1.42	1.95	1.04	0.72	0.37	1.59	0.89	0.66	1.82	1.86	1.05	1.16
5	1.86	1.51	2.24	1.61	1.18	0.6	2.46	1.33	1.32		1.81	1.32	3.37	0.86	1.21	1.99	1.23	1.02	1.93
