# Supplementary material for: Malnutrition drives infection susceptibility and dysregulated myelopoiesis that persists after refeeding intervention
Source: eLife. 2025 Jul 15;13:RP101670. doi: 10.7554/eLife.101670 (PMC12263150; doi:10.7554/eLife.101670)
Supplement: Figure 6—source data 1. [file elife-101670-fig6-data1.xlsx]

## Sheet: Fig 6b
Days elapsed	AL	RF	40RD
3		1
5		1
5		0
5		0
5		0
5		0
5		0
5		0
5		0
5		0
5		0
5		0
5		0
5		0
5		0
5	0
5	0
5	0
5	0
5	0
5	0
5	0
5	0
5	0
5	0
5	0
5	0
5	0
5	0
5	0
5		0
5		0
5		0
5		0
5		0
5		0
5		0
5		0
5		0
5		1
4			1
4			1
4			1
5			1
5			0
5			0
5			0
5			0
5			0
5			0
5	0
5	0
5	0
5	0
5	0
5	0
5	0
5	0
5	0
5	0

## Sheet: Fig 6c
AL																									RF																								40RD
0	0	306.122	0	0	0	0	0	0	0	0	0	48.1089	0	166.113	0	0	596	1060	0	0	0	0	0	0	0	0	427.168	0	412.882	0	0	262.009	0	270.758	100.908	215.012	0	541.619	0	0	0	0	4560	0	9150	13800	1610	2360	5910
[truncated: 9 more columns]

## Sheet: Fig 6d
Tissue	AL															RF
spleen	18.75	16.25	26.25	17.5	30	18	16	13.5	15	14	14	16	13.5	12.5	10.5	15	21.25	17.5	15	17.5	15.5	11	18.5	16.5	19.5	15.5	14		15.5	9.5
bone marrow	5.3	8	3.8	4.8	4.1	12.9	2.5	7.3	5.3	6.1	8	4.4	5.1	3	2.2	6	1.7	7.7	3.5	3.1	5.1	16.5	1.9	5.9	7.5	5.6	6.8	0	8.9	5.3

## Sheet: Fig 6e
AL															RF
4.03	1.15	2.49	2.03	2.25	2.02	1.7	2.07	1.91	1.99	2.51	2.83	2.31	2.68	1.88	1.67	2.98	1.98	2.42	2.03	1.84	0.99	1.94	2.43	2.42	2.84	2.28	1.63	1.63

## Sheet: Fig 6f
	AL															40RD
IFNγ	6.84	2.96	6.12	10.06	9.12	4.68	3.1	3.27	2.81	2.8	5.45	6.048	5.0625	5.0875	3.8535	3.54	7.45875	6.93	6.99	10.1675	3.4565	1.925	2.923	2.8215	4.485	6.541	7.532		5.363	3.382
TNFα	8.60625	5.2	11.4187	9.3975	12.57	7.038	5.456	5.8455	4.32	5.054	7.924	9.072	7.776	7.1	5.649	7.28875	6.23	5.61	10.64	7.874	4.587	4.6435	5.7255	7.7	7.1	9.394	6.448	4.4175

## Sheet: Fig 6g
	AL															40RD
IFNγ	3707	2983	3068	4277	3146	4527	4451	4244	4654	4023	4156	3645	4067	4231	4673	3575	3955	3414	3236	3138	4257	4048	4231	3891	4290	4181	4222	4315	4148
TNFα	5249	3602	4626	5418	4487	2877	3565	2928	2934	3242	3015	2653	2969	3192	3316	4549	4696	4689	5388	6262	3141	2715	2495	2308	2715	3247	2964	3241	3210

## Sheet: Fig 6i
	AL														40RD
0	0.9	1.11	0.83	0.87	0.57	1.23	0.81	2.71	0.75	0.57					0.37	0.54	0.75	0.24	0.82	1.1		0.2	0.12	0.54
5	4.03125	0.97125	1.225	1.47	1.98	1.232	0.2565	1.395	1.456	1.666	2.2	1.6335	2.075	1.512	0.315	0.765	0.77	0.54	0.84	0.7595	0.319	1.0915	0.594	0.8775	1.092	1.43063	0.9975

## Sheet: Fig 6k
Day	AL										40RD
0	0.55	2.6	3.58	2.61	2.1	2.85	1.72	3.5	2.37	1.96	2.28	1.75	2.28	1.4	1.92	3.12	1.27	3.8	2
5	5.94	3.96	3.11	3.45	2.8	5.6	4.84	5.54	4.5	3.78	2.79	1.98	1.68	2.64	4.49	3.41	3.36	1.77	3.1	2.76

## Sheet: Fig 6l
Day	AL										40RD
0	0.5	1.5	1.48	1.76	0.68	1.43	0.51	3.33	0.61	0.71	0.61	0.43	0.95	0.29	1.22	0.95	0.26	0.95	0.54
5	2.52	1.92	0.76	2.1	1.82	3.5	1.6	3.92	6	5.04	1.44	0.46	0.52	0.91	1.81	1.41	0.56	0.27	0.71	0.73
